# Supplementary material for: Temporal dynamics of TNF-mediated changes in hematopoietic stem cell function and recovery
Source: PubMed Central journal article supplement (PMC10031135; doi:10.1016/j.isci.2023.106341), 2023-03-05
Supplement: mmc1.pdf [file mmc1.pdf]

**iScience, Volume 26**

**Supplemental information**

**Temporal dynamics of TNF-mediated  
changes in hematopoietic stem cell  
function and recovery**

**Alexandra Rundberg Nilsson, Isabel Hidalgo, David Bryder, and Cornelis Jan Pronk**

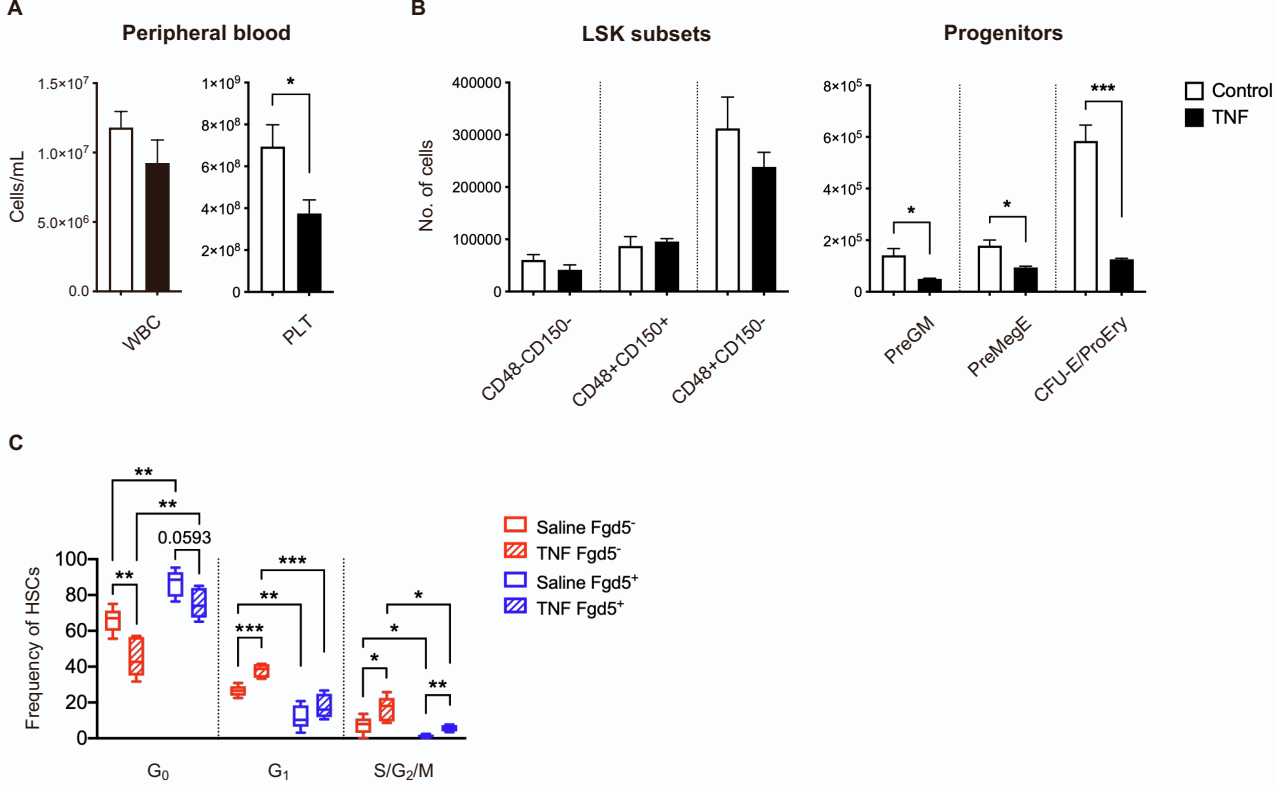

**Supplementary Figure 1.**

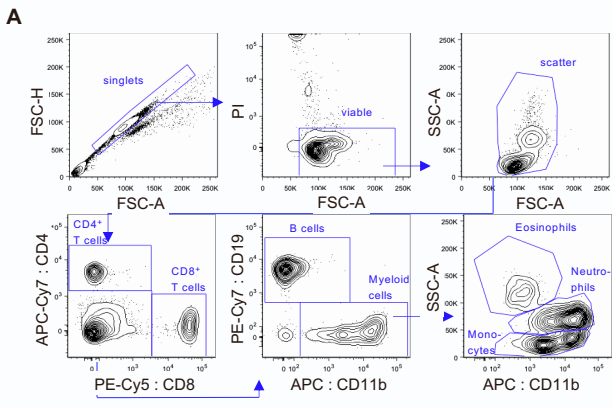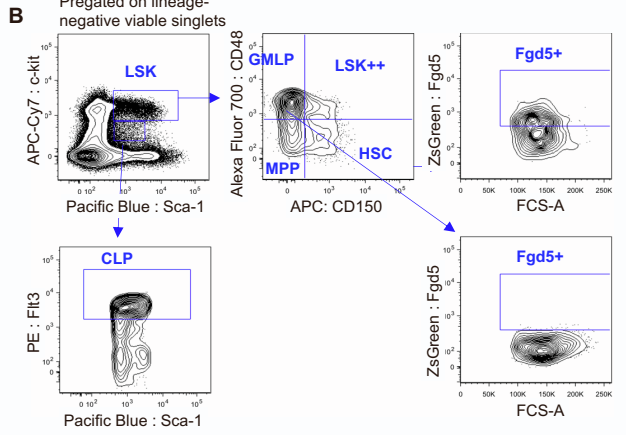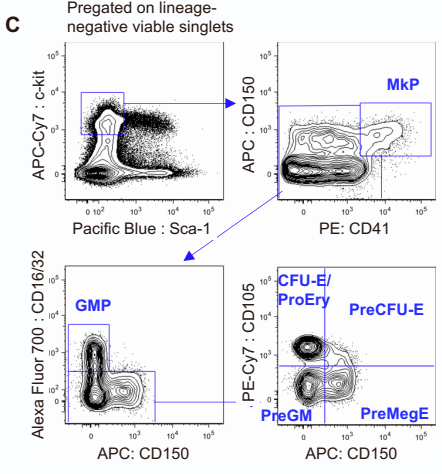

**Supplementary Figure 2.**

**A**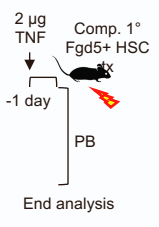**B**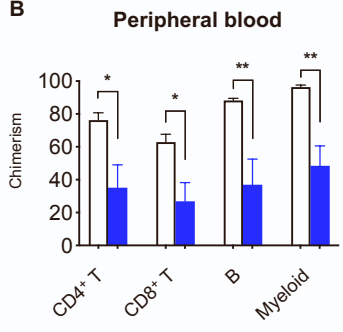**C**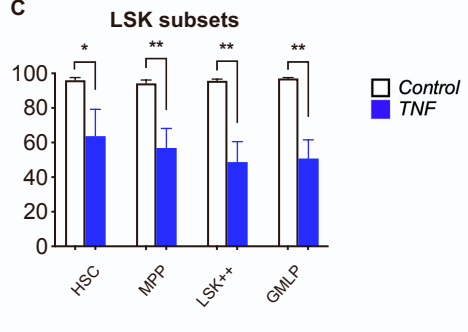

**Supplementary Figure 3.**

## SUPPLEMENTAL INFORMATION

### Supplemental figure legends

#### **Supplementary Figure 1. [Acute TNF stimulation results in reduced PB platelet levels and BM myeloid-erythroid progenitors, and increased HSC proliferation.]**

**Related to Figure 1.** A-C depict results one day post TNF administration. **(A)** PB WBC and PLT cell concentrations. **(B)** BM cell numbers for various subsets within the LSK compartment (left) and of progenitor populations (right). TNF-treated mice n = 5, control-treated mice n = 4. Error bars represent +SEM. **(C)** Cell cycle distribution of Fgd5<sup>-</sup> and Fgd5<sup>+</sup> HSCs from saline- and TNF-treated mice. Saline n = 5, TNF n = 5. Whiskers represent min to max. Comparisons were done using unpaired two-tailed student's t-tests, \*p < 0.05, \*\*p < 0.01, \*\*\*p < 0.001, \*\*\*\*p < 0.0001.

#### **Supplementary Figure 2. [Flow cytometry gating strategy for PB and BM cellular subsets.]**

**Related to Figures 1-3.** Representative flow cytometry gating for **(A)** PB populations, **(B)** BM HSC and lymphoid progenitor populations, and **(C)** BM myeloid, erythroid, and megakaryocytic progenitor populations.

#### **Supplementary Figure 3. [Active TNF signaling reduces HSC repopulation capacity.]**

**Related to figure 2.** **(A)** Experimental strategy to assess the activity of Fgd5<sup>+</sup> HSCs receiving one dose of TNF one day prior to transplantation. Results are depicted in B-C. **(B)** PB and **(C)** BM HSPC chimerism at 20 weeks post transplantation. WT n = 6, TNF n = 5. Error bars represent +SEM. Comparisons were done using unpaired two-tailed student's t-tests, \*p < 0.05, \*\*p < 0.01, \*\*\*p < 0.001, \*\*\*\*p < 0.0001.

Supplementary Table 2. [Downregulated pathways in TNF-exposed HSCs identified through gene set enrichment analysis.] Related to Table 1.

| Term                                                 | Overlap | P-value               | Adjusted P-value     | Odds Ratio         | Combined Score     | Genes                                                                                                                                     |
|------------------------------------------------------|---------|-----------------------|----------------------|--------------------|--------------------|-------------------------------------------------------------------------------------------------------------------------------------------|
| Rho GTPase cycle                                     | 11/123  | 1.0541317779794091E-5 | 0.007790033839267833 | 5.677541208791209  | 65.0658031592915   | PREX1;ARHGAP10;STARD8;MCF2;RAC2;ARHGAP18;ARHGEF18;PIK3R2;SRGAP3;RHOQ;RHOBTB2                                                              |
| Hemostasis pathway                                   | 22/468  | 2.7818417090565628E-5 | 0.010278905114964    | 2.8970392616667353 | 30.38939799759139  | DGKG;GUCY1A3;NFE2;SELP;TRPC6;DOCK8;PDGFB;PIK3R2;ITPR3;IGF1;MAPK14;GNG2;CDK5;MMRN1;INPP5D;RAC2;GNB4;SIRPA;ESAM;PRKACB;ZFPM1;SH2B1          |
| Lipid and lipoprotein metabolism                     | 22/489  | 5.3575924703435054E-5 | 0.013197536118612836 | 2.763740185581727  | 27.179756210012027 | ABCA1;CERS4;HSD3B7;CDK19;MTMR3;CHD9;GBA;INPL1;PRKAG2;PIK3R2;CROT;MED13L;SMPD2;GM2A;INPP5D;LPCAT2;ANGPTL4;HADH;PRKACB;ABCD1;PPARGC1B;ABCG1 |
| PI3K class IB pathway in neutrophils                 | 6/43    | 9.562137148561107E-5  | 0.017666048381966646 | 9.273028130170987  | 85.8229344338371   | PREX1;CYTH4;INPP5D;RAC2;PRKACB;PDK1                                                                                                       |
| GATA3-mediated activation of Th2 cytokine expression | 4/20    | 3.539340622779106E-4  | 0.048218533026207135 | 14.228260869565217 | 113.06345113427675 | NFATC2;NFATC1;MAPK14;PRKACB                                                                                                               |
| G alpha (12/13) signaling events                     | 7/77    | 3.914901192926154E-4  | 0.048218533026207135 | 5.725438596491228  | 44.919216389146435 | PREX1;GNG2;MCF2;RAC2;GNB4;ARHGEF18;PIK3R2                                                                                                 |

**Supplementary Table 4. [Upregulated pathways in TNF-exposed HSCs identified through gene set enrichment analysis.] Related to Table 1.**

| Term                                 | Overlap | P-value                | Adjusted P-value      | Odds Ratio         | Combined Score     | Genes                                                                                                                                                                                                          |
|--------------------------------------|---------|------------------------|-----------------------|--------------------|--------------------|----------------------------------------------------------------------------------------------------------------------------------------------------------------------------------------------------------------|
| <b>Myc Targets V1</b>                | 35/200  | 1.0604112613714109E-19 | 5.196015180719913E-18 | 8.743102668475803  | 381.99017698961836 | EIF4A1;SF3B3;ODC1;NOLC1;DDX21;GSPT1;UBE2L3;SRM;SYNCRIP;G3BP1;DHX15;USP1;EIF4H;PSMD1;SNRPB2;CCT3;CCT2;SSB;NCBP1;IFRD1;PA2G4;RAD23B;RSL1D1;PSMA4;PSMC6;TCP1;CANX;HNRNPD;MCM5;ETF1;TARDBP;ABCE1;EIF3D;KPNB1;EIF3B |
| <b>Interferon Gamma Response</b>     | 30/200  | 3.651428090324361E-15  | 5.963999214196456E-14 | 7.195085629188384  | 239.19096626997057 | CD274;MVP;TNFAIP2;NLRC5;ADAR;IFIT1;ICAM1;IL18BP;SOCS3;CCL5;NAMPT;CASP4;TNFSF10;ST8SIA4;PIM1;PDE4B;STAT2;STAT3;PARP14;SOD2;NFKB1;SELP;NFKBIA;PLSCR1;ZNF1;SERPING1;PSME2;LCP2;CD69;LY6E                          |
| <b>mTORC1 Signaling</b>              | 30/200  | 3.651428090324361E-15  | 5.963999214196456E-14 | 7.195085629188384  | 239.19096626997057 | PSMD12;INSIG1;RPN1;USO1;ATP2A2;VLDLR;HMGCR;STIP1;SERP1;NAMPT;SSR1;ACTR3;CYB5B;XBP1;HSPA5;HMGCS1;HSPA4;EDEM1;IFRD1;M6PR;IMMT;CCT6A;SQLE;SLC7A5;PSMA4;PSMC6;PSME3;CANX;ETF1;CALR                                 |
| <b>TNF-alpha Signaling via NF-kB</b> | 24/200  | 2.635517446603224E-10  | 3.2285088720889497E-9 | 5.488636363636363  | 121.06159753095606 | PTGER4;PFKFB3;TNFAIP2;RNF19B;TRAF1;SOD2;TANK;RELA;GEM;NFKB1;ICAM1;RHOB;NFKB2;EHD1;NFKBIA;SOCS3;CCL5;NAMPT;BCL3;PDE4B;CD69;NFKBIE;PDLIM5;BIRC3                                                                  |
| <b>Unfolded Protein Response</b>     | 18/113  | 4.596353223270804E-10  | 4.5044261588053884E-9 | 7.563742690058479  | 162.62491318708126 | EIF4A1;XBP1;HSPA5;EDEM1;EIF4A3;NOLC1;IFIT1;SDAD1;HERPUD1;SLC7A5;SPCS3;SERP1;DKC1;SSR1;HYOU1;CALR;ATF6;EIF4G1                                                                                                   |
| <b>Inflammatory Response</b>         | 21/200  | 3.781082707334731E-8   | 3.08788421099003E-7   | 4.692008744231236  | 80.18957470268029  | PTGER4;IL1R1;ITGB3;ATP2A2;AHR;SLC7A1;RELA;NFKB1;ICAM1;NFKBIA;IL18RAP;CCL5;NAMPT;TNFSF10;PDE4B;FFAR2;LCP2;CD69;SLC28A2;CD55;LY6E                                                                                |
| <b>G2-M Checkpoint</b>               | 19/200  | 7.976554252623375E-7   | 5.583587976836363E-6  | 4.180497807142451  | 58.70083256954046  | SLC12A2;HSPA8;TGFB1;CUL5;ODC1;NOLC1;SLC7A1;RAD23B;GSPT1;SQLE;SYNCRIP;SLC7A5;UCK2;DKC1;G3BP1;BCL3;HNRNPD;MCM5;KPNB1                                                                                             |
| <b>IL-2/STAT5 Signaling</b>          | 18/199  | 3.1353563363179708E-6  | 1.920405755994757E-5  | 3.9523224882340906 | 50.08686487338141  | CYFIP1;XBP1;GPR65;ODC1;AHR;TRAF1;RHOB;SOCS2;SELP;UCK2;PLSCR1;MUC1;MAPKAPK2;TNFSF10;PIM1;ENPP1;LTB;TGM2                                                                                                         |
| <b>IL-6/JAK/STAT3 Signaling</b>      | 11/87   | 1.1614789764841096E-5  | 6.32360776085793E-5   | 5.70139852674282   | 64.78631014850518  | SOCS3;TGFB1;IL1R1;ITGB3;STAT2;STAT3;PIM1;LTB;IL2RG;IL13RA1;PF4                                                                                                                                                 |
| <b>Myc Targets V2</b>                | 9/58    | 1.3557415513554027E-5  | 6.643133601641474E-5  | 7.21595547309833   | 80.88059175477478  | SUPV3L1;MYBBP1A;NDUFAF4;NOLC1;MPHOSPH10;MCM5;PA2G4;WDR43;SRM                                                                                                                                                   |
| <b>Complement</b>                    | 16/200  | 5.0030344592495686E-5  | 2.0429057375269071E-4 | 3.44119743406985   | 34.07776815292405  | USP14;DOCK4;HSPA5;LRP1;PREP;FN1;EHD1;PLSCR1;COL4A2;CCL5;CASP4;PIM1;SERPING1;ADAM9;LCP2;CD55                                                                                                                    |
| <b>Allograft Rejection</b>           | 16/200  | 5.0030344592495686E-5  | 2.0429057375269071E-4 | 3.44119743406985   | 34.07776815292405  | SPI1;TGFB1;GPR65;IL2RG;IL27RA;ICAM1;FGR;IL18RAP;CCL5;BCL3;ST8SIA4;LCP2;LTB;ABCE1;EIF3D;PF4                                                                                                                     |
| <b>Apoptosis</b>                     | 14/161  | 5.95897689755456E-5    | 2.2460759075397957E-4 | 3.7607385811467444 | 36.58456517910965  | APP;PSEN2;SOD2;RELA;RHOB;DNAJA1;CASP4;TNFSF10;PMAP1;TIMP3;CTNBN1;ETF1;CD69;BIRC3                                                                                                                               |

|                                          |        |                       |                       |                    |                    |                                                                                    |
|------------------------------------------|--------|-----------------------|-----------------------|--------------------|--------------------|------------------------------------------------------------------------------------|
| <b>Androgen Response</b>                 | 10/100 | 2.1517321329566838E-4 | 7.531062465348393E-4  | 4.364822312190733  | 36.85685296802441  | RPS6KA3;SPCS3;STEAP4;HMGCS1;INSIG1;UAP1;PA2G4;HMGCR;PDLIM5;FKBP5                   |
| <b>Epithelial Mesenchymal Transition</b> | 14/200 | 5.729734291110886E-4  | 0.0018717132017628895 | 2.9662058371735793 | 22.14175132712898  | ITGB1;TGFB1;TPM4;LRP1;ITGB3;FN1;TNFRSF11B;GEM;RHOB;GLIPR1;COL4A2;COL4A1;TIMP3;TGM2 |
| <b>UV Response Up</b>                    | 12/158 | 6.81570548091752E-4   | 0.002046316548097335  | 3.2325425993985966 | 23.568826236413006 | SULT1A1;NFKBIA;CYB5B;DNAJA1;STIP1;NXF1;RPN1;DDX21;SOD2;HSPA13;ICAM1;RHOB           |
| <b>Protein Secretion</b>                 | 9/96   | 7.099465575031571E-4  | 0.002046316548097335  | 4.056217345872518  | 29.40887724311624  | RPS6KA3;COPB2;TMED10;SNAP23;USO1;M6PR;ANP32E;TMED2;ATP1A1                          |
| <b>Coagulation</b>                       | 11/138 | 7.56346569193817E-4   | 0.0020589434383609466 | 3.402900448802926  | 24.45668248774843  | ARF4;LRP1;GDA;ITGB3;PREP;FN1;ADAM9;SERPING1;TIMP3;ISCU;PF4                         |
| <b>Cholesterol Homeostasis</b>           | 7/74   | 0.002597997750445961  | 0.0067000994616764255 | 4.084296825730503  | 24.31387710928505  | FDPS;SQLE;PLSCR1;HMGCS1;CTNNB1;HMGCR;HSD17B7                                       |
| <b>Apical Junction</b>                   | 11/200 | 0.012826455296009972  | 0.03142481547522443   | 2.279285660624403  | 9.92912772222282   | ITGB1;CD274;INSIG1;NF1;ADAM9;MSN;TNFRSF11B;MADCAM1;PIK3CB;TRAF1;ICAM1              |
| <b>Fatty Acid Metabolism</b>             | 9/158  | 0.018902871112150863  | 0.04410669926168535   | 2.360829774252593  | 9.368814750853424  | HSP90AA1;HMGCS1;ODC1;DLST;SERINC1;HSD17B7;GLUL;PRDX6;DLD                           |



## **SUPPLEMENTAL INFORMATION**

### **Supplemental table legends**

**Supplementary Table 2. [Downregulated pathways in TNF-exposed HSCs identified through gene set enrichment analysis.] Related to Table 1. BioPlanet gene sets, adj. p-value < 0.05.**

**Supplementary Table 4. [Upregulated pathways in TNF-exposed HSCs identified through gene set enrichment analysis.] Related to Table 1. MSigDB\_Hallmark gene sets, adj. p-value < 0.05.**
